# Supplementary material for: Loci associated with adult stature also affect calf birth survival in cattle
Source: PubMed Central journal article supplement (PMC4426170; doi:10.1186/s12863-015-0202-3), 2015-05-03
Supplement: 12863_2015_202_MOESM1_ESM.pdf [file 12863_2015_202_MOESM1_ESM.pdf]

## Loci associated with adult stature also affect calf birth survival in cattle

Goutam Sahana, Johanna K. Höglund, Bernt Guldbbrandtsen and Mogens S. Lund

### Supplementary text

**Sire Model (SM) for Genome Scan.** The genome was initially scanned using two index traits; service sire calving index (SCI) and body conformation index (BCI), following the sire model. A single SNP analysis was conducted, where each SNP was consecutively tested for phenotype association. The following model was used to estimate SNP effects:

$$y_{ij} = \mu + bx_{ij} + s_i + p_k + e_{ij}$$

where  $y_{ij}$  is the de-regressed breeding value of individual  $j$ , belonging to the half-sib (sire) family  $i$ ,  $\mu$  is the general mean,  $b$  is the allelic substitution effect,  $x_{ij}$  is the number of allele copies (with arbitrary labeling) of SNP count in individual  $j$  (corresponding to 0, 1, or 2 copies), and  $s_i$  is the random effect of the  $i$ -th half-sib family assumed to exhibit a normal distribution  $s \sim N(0, \sigma_s^2)$ , where  $\sigma_s^2$  is the sire variance,  $p_k$  is the effect of the  $k$ -th population. The vector of random environmental deviates  $e = \{e_j\}$  follows a multivariate normal distribution  $N(\mathbf{0}, \mathbf{W}^{-1} \sigma_e^2)$ , where  $\sigma_e^2$  is the error variance, and  $\mathbf{W}$  is the diagonal matrix containing weights of de-regressed estimated breeding values. The weight  $w_j$  for individual  $j$  is estimated as  $w_j = r_j^2 / (1 - r_j^2)$ , where  $r_j^2$  is the reliability of the de-regressed EBV of individual  $j$ . Values of  $r_j^2 > 0.98$  were reduced to 0.98 to avoid excessively large sire weights under large numbers of progeny records. All statistical analyses were conducted using DMU software (Madsen & Jensen, 1910). The null hypothesis  $H_0: b = 0$  was tested using a  $t$ -test. A significant association between a SNP and trait were accepted if the  $-\log_{10}(P\text{-value})$  was  $> 8.25$  (applying a Bonferroni multiple test correction for

simultaneous testing of 8,938,927 SNPs). Pair-wise LD between top associated markers was estimated using PLINK software (Purcell et al. 2007).

### **Reference**

Madsen P, Jensen J: DMU A Package for Analysing Multivariate Mixed Models. 6 edn; 2013.

Purcell S, Neale B, Todd-Brown K, Thomas L, Ferreira MA, Bender D, Maller J, Sklar P, de Bakker PI, Daly MJ, Sham PC. PLINK: A tool set for whole-genome association and population-based linkage analyses. *Am. J. Hum. Genet.* 2007; 81: 559–575

**Figure S1** Distribution of accuracies for de-regressed proofs for stature in Nordic Red cattle.

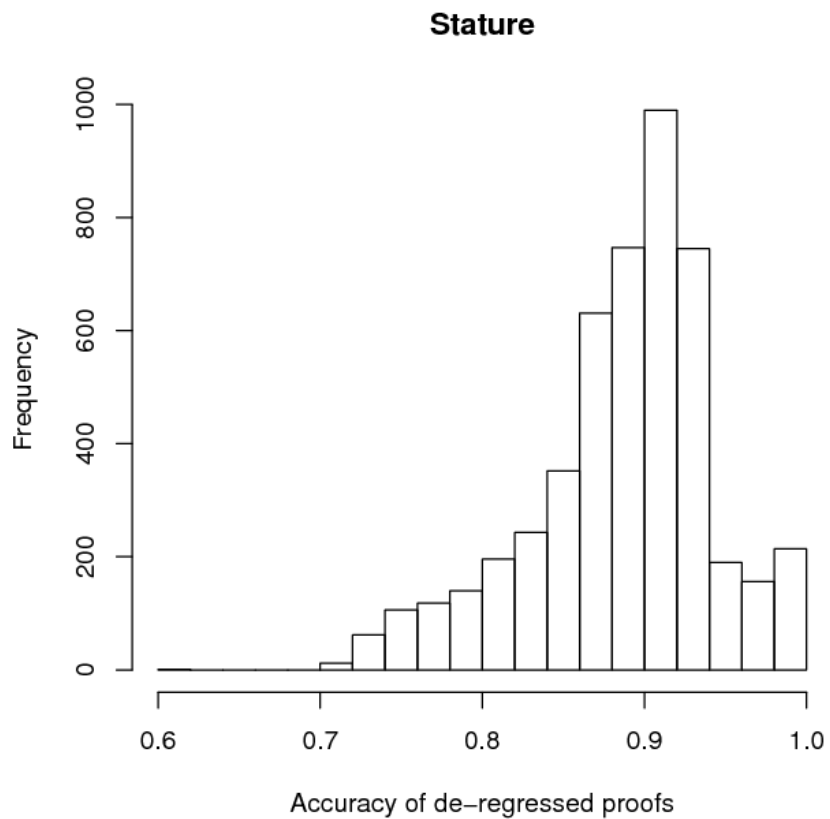

**Table S1 Top twenty markers on chromosome 6 associated with service sire calving index (SCI) using a sire-model in Nordic Red cattle.**

**Markers are arranged in descending order of  $-\log_{10}(P\text{-value})$**

| SNP           | rs-ID       | Position (bp) | MAF   | Effect | SE    | $-\log_{10}(p\text{-value})$ | LD with Chr6:3812750 | Variant type        |
|---------------|-------------|---------------|-------|--------|-------|------------------------------|----------------------|---------------------|
| Chr6:38127504 | rs110329232 | 38127504      | 0.312 | -3.769 | 0.231 | 57.502                       | 1                    | 5_prime_UTR_variant |
| Chr6:39697560 | rs380475261 | 39697560      | 0.367 | 3.394  | 0.221 | 51.032                       | 0.16                 | intergenic variant  |
| Chr6:39685188 | rs109068573 | 39685188      | 0.370 | 3.380  | 0.221 | 50.862                       | 0.16                 | intergenic variant  |
| Chr6:39683942 | rs383383037 | 39683942      | 0.369 | 3.366  | 0.220 | 50.753                       | 0.16                 | intergenic variant  |
| Chr6:39687057 | rs110152364 | 39687057      | 0.369 | -3.367 | 0.220 | 50.747                       | 0.16                 | intergenic variant  |
| Chr6:38956499 | rs109301655 | 38956499      | 0.084 | -6.470 | 0.427 | 49.737                       | 0.02                 | Intron variant      |
| Chr6:39142464 | NA          | 39142464      | 0.083 | -6.460 | 0.427 | 49.629                       | 0.02                 | intergenic variant  |
| Chr6:39142325 | rs109336064 | 39142325      | 0.083 | -6.460 | 0.427 | 49.629                       | 0.02                 | intergenic variant  |
| Chr6:39142333 | rs110116541 | 39142333      | 0.083 | -6.460 | 0.427 | 49.629                       | 0.02                 | intergenic variant  |
| Chr6:39181207 | NA          | 39181207      | 0.083 | -6.459 | 0.427 | 49.629                       | 0.02                 | intergenic variant  |
| Chr6:39164044 | rs379180947 | 39164044      | 0.083 | -6.459 | 0.427 | 49.615                       | 0.02                 | intergenic variant  |
| Chr6:39165804 | rs384077114 | 39165804      | 0.083 | -6.459 | 0.427 | 49.615                       | 0.02                 | intergenic variant  |
| Chr6:39140538 | rs208984737 | 39140538      | 0.083 | -6.470 | 0.428 | 49.612                       | 0.02                 | intergenic variant  |
| Chr6:39142430 | rs382938133 | 39142430      | 0.083 | -6.459 | 0.427 | 49.612                       | 0.02                 | intergenic variant  |
| Chr6:39148421 | rs110704385 | 39148421      | 0.083 | -6.458 | 0.427 | 49.612                       | 0.02                 | intergenic variant  |

|               |             |          |       |        |       |        |      |                    |
|---------------|-------------|----------|-------|--------|-------|--------|------|--------------------|
| Chr6:39139362 | rs110186942 | 39139362 | 0.083 | -6.458 | 0.427 | 49.611 | 0.02 | intergenic variant |
| Chr6:39139659 | NA          | 39139659 | 0.083 | -6.458 | 0.427 | 49.611 | 0.02 | intergenic variant |
| Chr6:39139764 | rs384540439 | 39139764 | 0.083 | -6.458 | 0.427 | 49.611 | 0.02 | intergenic variant |
| Chr6:39105359 | rs207689046 | 39105359 | 0.082 | -6.575 | 0.435 | 49.609 | 0.02 | intergenic variant |
| Chr6:39072546 | rs109576691 | 39072546 | 0.083 | -6.458 | 0.427 | 49.608 | 0.02 | intergenic variant |

---

rs-ID = reference SNP identification; MAF = minor allele frequency; effect = allele substitution effect for the SNP; SE = SE for the SNP effect; LD =

linkage disequilibrium; NA = not available.

**Table S2 Top twenty markers on chromosome 6 associated with body conformation index (BCI) using a sire-model in Nordic Red cattle.**

**Markers are arranged in descending order of  $-\log_{10}(P\text{-value})$**

| name          | rs-ID       | Position (bp) | MAF   | Effect | SE    | $-\log_{10}(p\text{-value})$ | LD with Chr6:39685188 | Variant type       |
|---------------|-------------|---------------|-------|--------|-------|------------------------------|-----------------------|--------------------|
| Chr6:39685188 | rs109068573 | 39685188      | 0.396 | -4.356 | 0.209 | 89.446                       | 1                     | intergenic variant |
| Chr6:39697560 | rs380475261 | 39697560      | 0.393 | -4.363 | 0.210 | 89.367                       | 1                     | intergenic variant |
| Chr6:39683942 | rs383383037 | 39683942      | 0.395 | -4.336 | 0.208 | 89.211                       | 1                     | intergenic variant |
| Chr6:39687057 | rs110152364 | 39687057      | 0.395 | 4.332  | 0.209 | 89.001                       | 1                     | intergenic variant |
| Chr6:38127504 | rs110329232 | 38127504      | 0.340 | 4.364  | 0.219 | 82.406                       | 0.16                  | intergenic variant |
| Chr6:39750067 | NA          | 39750067      | 0.448 | -4.057 | 0.207 | 79.689                       | 0.57                  | intergenic variant |
| Chr6:39750084 | NA          | 39750084      | 0.450 | -4.066 | 0.208 | 79.663                       | 0.57                  | intergenic variant |
| Chr6:39743900 | rs382209066 | 39743900      | 0.426 | 4.096  | 0.209 | 79.619                       | 0.59                  | intergenic variant |
| Chr6:39742108 | rs384995333 | 39742108      | 0.433 | -4.056 | 0.207 | 79.544                       | 0.59                  | intergenic variant |
| Chr6:39738116 | rs385682668 | 39738116      | 0.442 | -3.991 | 0.204 | 79.532                       | 0.58                  | intergenic variant |
| Chr6:39743242 | rs378728820 | 39743242      | 0.427 | 4.089  | 0.209 | 79.486                       | 0.58                  | intergenic variant |
| Chr6:39736273 | rs209355309 | 39736273      | 0.442 | -3.990 | 0.204 | 79.460                       | 0.59                  | intergenic variant |
| Chr6:39736193 | rs207702574 | 39736193      | 0.442 | -3.989 | 0.204 | 79.445                       | 0.59                  | intergenic variant |
| Chr6:39738853 | rs211509820 | 39738853      | 0.441 | -3.984 | 0.204 | 79.364                       | 0.59                  | intergenic variant |

|               |             |          |       |        |       |        |      |                    |
|---------------|-------------|----------|-------|--------|-------|--------|------|--------------------|
| Chr6:39743937 | rs379917426 | 39743937 | 0.431 | 4.047  | 0.207 | 79.314 | 0.59 | intergenic variant |
| Chr6:39738209 | rs383270383 | 39738209 | 0.440 | -3.971 | 0.203 | 79.281 | 0.59 | intergenic variant |
| Chr6:39743625 | rs382359324 | 39743625 | 0.433 | 4.025  | 0.206 | 79.255 | 0.59 | intergenic variant |
| Chr6:39740380 | NA          | 39740380 | 0.440 | -3.968 | 0.203 | 79.223 | 0.59 | intergenic variant |
| Chr6:39736135 | rs210654216 | 39736135 | 0.439 | -3.967 | 0.203 | 79.220 | 0.59 | intergenic variant |
| Chr6:39737297 | rs110241699 | 39737297 | 0.440 | -3.967 | 0.203 | 79.205 | 0.59 | intergenic variant |

rs-ID = reference SNP identification; MAF = minor allele frequency; effect = allele substitution effect for the SNP; SE = SE for the SNP effect; LD = linkage disequilibrium ; NA = not available.

**Table S3 SNPs from the LCORL gene showing the most significant association with calf size (SCSL) used for constructing haplotypes (HAP1)**

| SNP           | rs-ID       | Position<br>(bp) | MAF   | Effect | SE    | $-\log_{10}(\text{p-value})$ | Variant type   |
|---------------|-------------|------------------|-------|--------|-------|------------------------------|----------------|
| Chr6:38893987 | rs385255004 | 38893987         | 0.083 | 6.43   | 0.286 | 105.928                      | intron variant |
| Chr6:38908960 |             | 38908960         | 0.079 | 6.751  | 0.300 | 105.788                      | intron variant |
| Chr6:38910101 | rs379009029 | 38910101         | 0.079 | 6.751  | 0.300 | 105.785                      | intron variant |
| Chr6:38910119 | rs381823183 | 38910119         | 0.079 | 6.751  | 0.300 | 105.788                      | intron variant |
| Chr6:38911548 | rs109256415 | 38911548         | 0.083 | 6.426  | 0.285 | 105.821                      | intron variant |
| Chr6:38914196 | rs110995268 | 38914196         | 0.083 | 6.425  | 0.285 | 105.821                      | intron variant |
| Chr6:38942103 | rs109188585 | 38942103         | 0.083 | 6.416  | 0.285 | 105.813                      | intron variant |
| Chr6:38947564 | rs110369727 | 38947564         | 0.083 | 6.408  | 0.285 | 105.818                      | intron variant |
| Chr6:38956109 | rs109810741 | 38956109         | 0.084 | 6.414  | 0.285 | 105.802                      | intron variant |
| Chr6:38956499 | rs109301655 | 38956499         | 0.084 | 6.415  | 0.285 | 105.992                      | intron variant |
| Chr6:38960730 | rs109315734 | 38960730         | 0.083 | 6.408  | 0.285 | 105.825                      | intron variant |



|               |             |          |       |       |       |         |                |
|---------------|-------------|----------|-------|-------|-------|---------|----------------|
| Chr6:38963718 | rs377959514 | 38963718 | 0.083 | 6.409 | 0.285 | 105.847 | intron variant |
| Chr6:38972255 |             | 38972255 | 0.084 | 6.408 | 0.285 | 105.675 | intron variant |
| Chr6:38977050 | rs109929997 | 38977050 | 0.083 | 6.408 | 0.285 | 105.824 | intron variant |
| Chr6:38981742 | rs109673676 | 38981742 | 0.082 | 6.502 | 0.289 | 105.826 | intron variant |

rs-ID = reference SNP identification; MAF = minor allele frequency; effect = allele substitution effect for the SNP; SE = SE for the SNP effect; NA = not available.

**Table S4 SNP markers showing most significant association with body conformation used for constructing haplotypes (HAP2) and haplotype-based association analysis**

| Chromosome    | rs_ID | Position (bp) | MAF   | Effect | SE    | $-\log_{10}(\text{p-value})$ | Variant type          |
|---------------|-------|---------------|-------|--------|-------|------------------------------|-----------------------|
| Chr6:38700703 | NA    | 38700703      | 0.217 | 5.110  | 0.253 | 85.071                       | intergenic variant    |
| Chr6:38702123 | NA    | 38702123      | 0.217 | 5.110  | 0.253 | 85.071                       | intergenic variant    |
| Chr6:38703870 | NA    | 38703870      | 0.217 | 5.110  | 0.253 | 85.071                       | intergenic variant    |
| Chr6:38706518 | NA    | 38706518      | 0.217 | 5.110  | 0.253 | 85.071                       | intergenic variant    |
| Chr6:38707082 | NA    | 38707082      | 0.217 | 5.110  | 0.253 | 85.071                       | intergenic variant    |
| Chr6:38709292 | NA    | 38709292      | 0.217 | 5.110  | 0.253 | 85.071                       | intergenic variant    |
| Chr6:38714200 | NA    | 38714200      | 0.217 | 5.110  | 0.253 | 85.071                       | intergenic variant    |
| Chr6:38721008 | NA    | 38721008      | 0.217 | 5.110  | 0.253 | 85.071                       | intergenic variant    |
| Chr6:38734907 | NA    | 38734907      | 0.217 | 5.110  | 0.253 | 85.071                       | intergenic variant    |
| Chr6:38763321 | NA    | 38763321      | 0.217 | 5.109  | 0.253 | 85.054                       | upstream gene variant |
| Chr6:38765427 | NA    | 38765427      | 0.217 | 5.110  | 0.253 | 85.055                       | upstream gene variant |
| Chr6:38765668 | NA    | 38765668      | 0.217 | 5.109  | 0.253 | 85.055                       | upstream gene variant |
| Chr6:38766261 | NA    | 38766261      | 0.217 | 5.109  | 0.253 | 85.051                       | intron variant        |

|               |    |          |       |       |       |        |                    |
|---------------|----|----------|-------|-------|-------|--------|--------------------|
| Chr6:38810147 | NA | 38810147 | 0.218 | 5.118 | 0.253 | 85.271 | intron variant     |
| Chr6:38810462 | NA | 38810462 | 0.218 | 5.117 | 0.253 | 85.274 | intron variant     |
| Chr6:38914033 | NA | 38914033 | 0.220 | 5.165 | 0.252 | 87.201 | intron variant     |
| Chr6:38924562 | NA | 38924562 | 0.220 | 5.163 | 0.252 | 87.176 | intron variant     |
| Chr6:38934652 | NA | 38934652 | 0.220 | 5.163 | 0.252 | 87.176 | intron variant     |
| Chr6:38961998 | NA | 38961998 | 0.219 | 5.163 | 0.252 | 87.090 | intron variant     |
| Chr6:39008980 | NA | 39008980 | 0.219 | 5.163 | 0.252 | 87.097 | intergenic variant |
| Chr6:39030068 | NA | 39030068 | 0.219 | 5.163 | 0.252 | 87.102 | intergenic variant |
| Chr6:39052140 | NA | 39052140 | 0.219 | 5.168 | 0.252 | 87.141 | intergenic variant |
| Chr6:39077951 | NA | 39077951 | 0.219 | 5.168 | 0.252 | 87.141 | intergenic variant |
| Chr6:39078732 | NA | 39078732 | 0.219 | 5.168 | 0.252 | 87.141 | intergenic variant |
| Chr6:39078733 | NA | 39078733 | 0.219 | 5.168 | 0.252 | 87.141 | intergenic variant |

---

rs-ID = reference SNP identification; MAF = minor allele frequency; effect = allele substitution effect for the SNP; SE = SE for the SNP effect; NA = not available.

**Table S5 Model Comparisons for haplotype based association analyses, to include HAP1, HAP2, or both haplotypes in the model**

| Trait       | M0 = breed + polygene |          | M1 = breed + HAP1 +<br>polygene |          | M2 = breed + HAP2 +<br>polygene |          | M3 = breed + HAP1 + HAP2 +<br>polygene |          |
|-------------|-----------------------|----------|---------------------------------|----------|---------------------------------|----------|----------------------------------------|----------|
|             | ErrVar.M0             | AIC.M0   | ErrVar.M1                       | AIC.M1   | ErrVar.M2                       | AIC.M2   | ErrVar.M3                              | AIC.M3   |
| Stature     | 6.13                  | 20566.99 | 1.12E-04*                       | 20415.55 | 11.28                           | 20076.7  | 0.30                                   | 19863.92 |
| Body Depth  | 9.13                  | 18761.32 | 5.02                            | 18735.04 | 11.72                           | 18534.85 | 6.33                                   | 18496.18 |
| Chest Width | 7.16                  | 19071.51 | 4.87                            | 19024.37 | 10.17                           | 18818.42 | 7.02                                   | 18750.14 |
| Dairy Form  | 4.34                  | 17806.93 | 4.19                            | 17808.6  | 4.65                            | 17675.5  | 4.41                                   | 17676.60 |
| Rump Width  | 1.42                  | 18357.25 | 3.00E-02*                       | 18320.94 | 3.94                            | 18069.05 | 2.68                                   | 18013.31 |
| Rump Angle  | 8.31                  | 18102.36 | 8.28                            | 18105.7  | 8.44                            | 17970.79 | 8.41                                   | 17974.03 |
| SCEF        | 16.78                 | 22047.29 | 10.13                           | 21718.57 | 16.68                           | 21585.39 | 9.88                                   | 21172.46 |
| SCEL        | 26.78                 | 23022.00 | 19.89                           | 22674.6  | 26.01                           | 22562.11 | 18.79                                  | 22130.79 |
| SSBF        | 26.17                 | 25805.45 | 11.12                           | 25667.12 | 29.20                           | 25350.37 | 13.38                                  | 25171.08 |

|      |       |          |           |          |       |          |       |          |
|------|-------|----------|-----------|----------|-------|----------|-------|----------|
| SSBL | 15.05 | 25775.05 | 1.86E-04* | 25653.54 | 19.54 | 25398.42 | 1.31  | 25247.92 |
| SCSF | 21.79 | 21110.13 | 17.71     | 20741.85 | 20.85 | 20694.2  | 16.33 | 20242.95 |
| SCSL | 20.66 | 20741.15 | 17.56     | 20291    | 19.97 | 20368.18 | 16.44 | 19829.67 |
| SCI  | 35.87 | 25955.95 | 16.14     | 25778.34 | 38.28 | 25486.63 | 18.49 | 25259.49 |
| BCI  | 9.60  | 17666.70 | 3.60      | 17537.62 | 13.94 | 17220.57 | 5.25  | 17026.02 |

---

\* Model did not converge due numerical instability (very low error variance) and therefore could not estimate the variance component; ErrVar = Error variance, AIC = Akaike Information Criterion
